# Supplementary material for: Thermodynamic model for voltammetric responses in conducting redox polymers
Source: Royal Society of Chemistry journal article supplement (doi:10.1039/d4cp00222a), 2024-01-01
Supplement: d4cp00222a1.pdf [file d4cp00222a1.pdf]

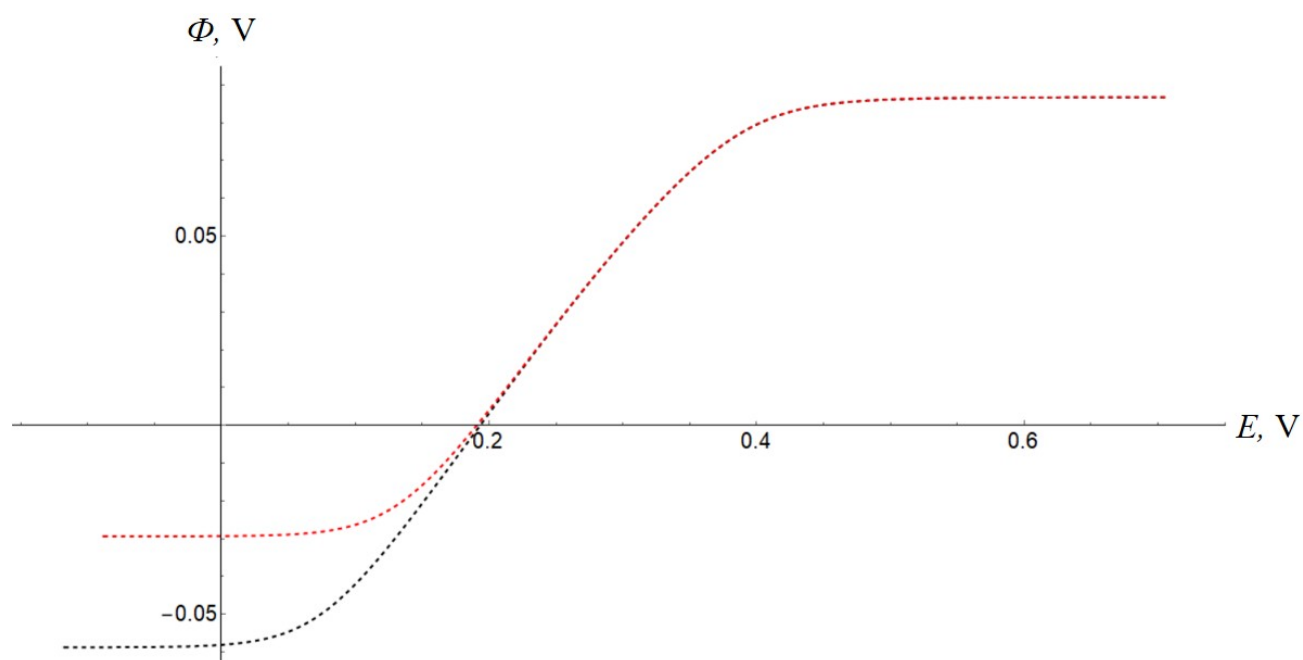

**Figure 1s** The film bulk potential  $\Phi$  dependence on the electrode potential  $E$ . Parameters are following:  $n = 1$ ,  $m = 2$ ,  $N = 2$  mol/l;  $K_A = 0.1$ ,  $C_0 = 1$  mol/l. Black line  $K_K = 0.001$ ; Red line  $K_K = 0.01$ .
